# Supplementary material for: A general and simple method to synthesize well-crystallized nanostructured vanadium oxides for high performance Li-ion batteries
Source: Royal Society of Chemistry journal article supplement (doi:10.1039/c5ta00594a), 2015-01-01
Supplement: c5ta00594a1.pdf [file c5ta00594a1.pdf]

# **A General and Simple Method to Synthesize Well-crystallized Nanostructured Vanadium Oxides for High Performance Li-ion Batteries**

Liye Li<sup>a,b</sup>, Pengcheng Liu<sup>a,b</sup>, Kongjun Zhu<sup>a\*</sup>, Jing Wang<sup>a</sup>, Jinsong Liu<sup>a,b</sup> and Jinhao Qiu<sup>a</sup>

<sup>a</sup> State Key Laboratory of Mechanics and Control of Mechanical Structures, Nanjing University of Aeronautics and Astronautics, Nanjing 210016, China

<sup>b</sup> College of Materials Science and Technology, Nanjing University of Aeronautics and Astronautics, Nanjing 210016, China

## **Experimental Section**

### **Materials**

The starting materials, including  $V_2O_5$  and oxalic acid ( $H_2C_2O_4 \cdot 2H_2O$ ), were obtained from Sinopharm Chemical Reagent Co., Ltd., China. All chemical reagents were of analytical grade and used without further purification.

### **Synthesis**

The synthesis process of HTMM was further optimized based on results of previous studies. Three kinds of 1D-vanadium oxides with high crystallinity, namely,  $V_3O_7 \cdot H_2O$ ,  $VO_2$  (B), and  $VO_2$  (A), were synthesized through HTMM under hydrothermal conditions.  $V_2O_5$  was used as the vanadium source, and oxalic acid ( $H_2C_2O_4 \cdot 2H_2O$ ) was used as the reducing agent. The preparation process was simple, and the autoclave-filling ratio (approximately 25%) was smaller than in other methods. First, appropriate amounts of  $V_2O_5$  and de-ionized water were placed in one of the two chambers of a Teflon-lined multi-chamber autoclave, whereas corresponding amounts of oxalic acid solution were poured into the other chamber. These solutions were then heated to 240 °C for different times.

After cooling the autoclave to room temperature, the formed precipitates were washed several times with de-ionized water and ethanol. The precipitates were then dried at 80 °C for 10 h.

### **Characterization**

The phase structure of the resultant powders was determined by powder X-ray diffraction (Bruker D8 Advance, Germany) using Cu  $K\alpha$  radiation ( $\lambda = 0.15418$  nm).

The morphologies of the prepared particles were observed by field emission scanning electron microscopy (HITACHI S-4800, Japan) and transmission electron microscopy (TEM; Tecnai G2 F30 S-Twin TEM, FEI, USA). The optical properties of the samples were tested by Fourier transform infrared spectroscopy (FTIR; NEXUS670, USA) using an adapted heating controlled cell. The FTIR patterns of the solid samples were measured using the KBr pellet technique. Approximately 1 wt% of the samples and 99 wt% of KBr were mixed homogeneously, and the mixture was pressed to a pellet.

### **Electrochemical testing**

The active materials [VO<sub>2</sub> (A), VO<sub>2</sub> (B), and V<sub>3</sub>O<sub>7</sub>•H<sub>2</sub>O], acetylene black, and polytetrafluoroethylene were mixed well into weight ratios of 7:2:1, 7:2:1, and 6:3:1, respectively, to obtain a slurry. The obtained slurry was casted on aluminum foil to obtain a laminate. The laminate was dried for 5 min under an incandescent lamp before drying in a vacuum oven at 75 °C for 12 h. The dried laminate was punched into round discs with diameters of 12 mm. Coin cells (2032) were assembled in an argon-filled glove box with O<sub>2</sub> concentrations of less than 1 ppm. A lithium metal foil was used as a counter electrode, and Celgard2400 was used as a separator. The electrolyte solution was 1.0 M LiPF<sub>6</sub> in EC/DEC (1:1 vol/vol). Galvanostatic charge/discharge measurement was performed by a multichannel battery testing system (LAND CT2001A). All electrochemical measurements were conducted at room temperature.

**Table S1** Interlay spacing of some representative lattice planes

| Items          | VO <sub>2</sub> (A) |          | VO <sub>2</sub> (B) |          | V <sub>3</sub> O <sub>7</sub> •H <sub>2</sub> O |          |
|----------------|---------------------|----------|---------------------|----------|-------------------------------------------------|----------|
| Lattice planes | (110)               | (200)    | (110)               | (200)    | (370)                                           | (002)    |
| Spacing        | 0.589 nm            | 0.576 nm | 0.351 mm            | 0.803 nm | 0.191 nm                                        | 0.181 nm |

**Table S2** Detailed refined data of  $V_3O_7 \cdot H_2O$  nanobelts,  $VO_2$  (B) nanosheets and  $VO_2$  (A) nanorods.

| Items             | $V_3O_7 \cdot H_2O$                                                                        | $VO_2$ (B)                                                                                        | $VO_2$ (A)                                                                             |
|-------------------|--------------------------------------------------------------------------------------------|---------------------------------------------------------------------------------------------------|----------------------------------------------------------------------------------------|
| Space group       | Pnam                                                                                       | C2/m                                                                                              | P42/ncm                                                                                |
| Agreement factors | Chi2 (S <sup>2</sup> )=1.06, Rwp=18.8                                                      | Chi2 (S <sup>2</sup> )=1.15, Rwp=18.7                                                             | Chi2 (S <sup>2</sup> )=4.23, Rwp=18.3                                                  |
| Cell parameters   | a=16.89522, b=9.34784, 3.64445<br>$\alpha=90^\circ$ , $\beta=90^\circ$ , $\gamma=90^\circ$ | a=12.07485, b=3.69384, 6.42377<br>$\alpha=90^\circ$ , $\beta=106.97684^\circ$ , $\gamma=90^\circ$ | a=8.4584, b=8.4584, 7.6966<br>$\alpha=90^\circ$ , $\beta=90^\circ$ , $\gamma=90^\circ$ |
| Atom position     | x y z                                                                                      |                                                                                                   |                                                                                        |
|                   | V1 0.04722 0.11349 0.25000                                                                 |                                                                                                   |                                                                                        |
|                   | V2 0.85316 0.07517 0.25000                                                                 |                                                                                                   |                                                                                        |
|                   | V3 0.45082 0.12277 0.25000                                                                 | x y z                                                                                             |                                                                                        |
|                   | O1 0.96115 0.96257 0.25000                                                                 | V1 0.30481 0.00000 0.72691                                                                        | x y z                                                                                  |
|                   | O2 0.09133 0.26498 0.25000                                                                 | V2 0.40408 0.00000 0.30992                                                                        | V 0.22150 0.02739 0.13946                                                              |
|                   | O3 0.14405 0.94756 0.25000                                                                 | O1 0.37365 0.00000 0.00519                                                                        | O1 0.16283 0.76387 0.38530                                                             |
|                   | O4 0.83142 0.37535 0.25000                                                                 | O2 0.23937 0.00000 0.33899                                                                        | O2 0.12631 0.61178 0.64488                                                             |
|                   | O5 0.76585 0.17786 0.25000                                                                 | O3 0.44219 0.00000 0.64472                                                                        | O3 0.09689 -0.06869 0.63246                                                            |
|                   | O6 0.78419 0.91715 0.25000                                                                 | O4 0.13430 0.00000 0.70384                                                                        |                                                                                        |
|                   | O7 0.53350 0.88293 0.25000                                                                 |                                                                                                   |                                                                                        |
|                   | O8 0.37835 0.00169 0.25000                                                                 |                                                                                                   |                                                                                        |

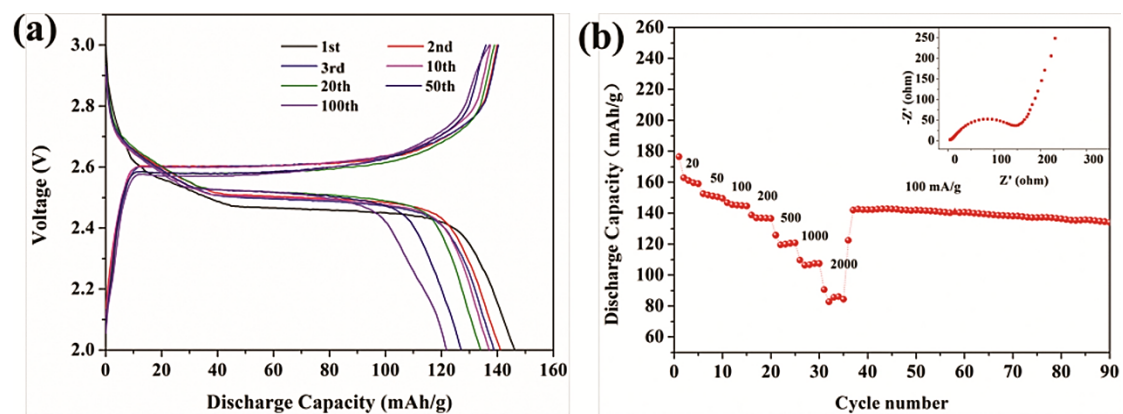

**Fig. S1** Electrochemical measurements of VO<sub>2</sub> (B) nanosheets. (a) Charge-discharge curves at 100 mA/g; (b) rate properties (inset is the EIS measurement).

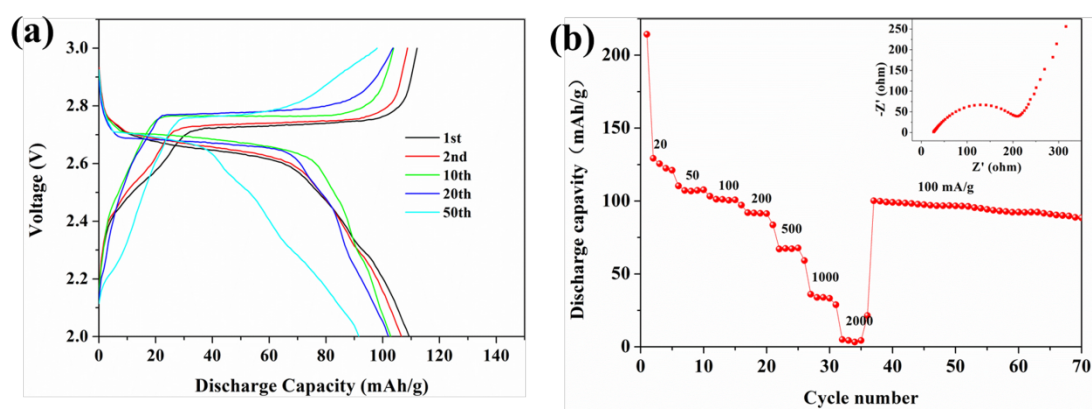

**Fig. S2** Electrochemical measurements of VO<sub>2</sub> (A) nanorods.. (a) Charge-discharge curves at 100 mA/g; (b) rate properties (inset is the EIS measurement).

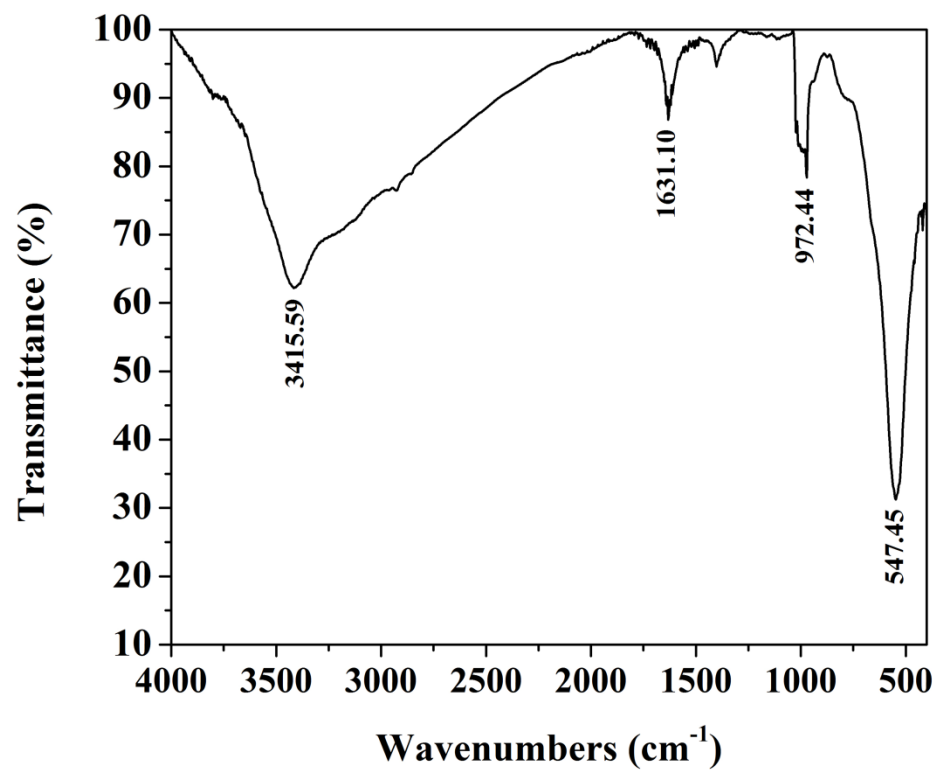

Fig. S3 FTIR patterns of  $V_3O_7 \cdot H_2O$  nanobelts.
